# Supplementary material
Source: MDPI journal article supplement (https://www.mdpi.com/2073-4395/13/12/3067)
Supplement: s1 [file s1]

**Table S1.** Primer sequences for qRT-PCR analysis of target genes of miRNAs

| Sequence name        | Forward primer (5'- 3') | Reverse primer (5'- 3')                             |
|----------------------|-------------------------|-----------------------------------------------------|
| <i>Tp</i> -miRNA156  | GCGTCGGACCAGGCTTCA      | GTCGTATCCAGTGCAGGGTCCGAGGTATTCGCACTGGATACGAC GAGGAA |
| <i>Tp</i> -miRNA164  | GTGTTGGCCCCGGCTCA       | GTCGTATCCAGTGCAGGGTCCGAGGTATTCGCACTGGATACGAC TCTGAG |
| <i>Tp</i> -miRNA4995 | GCGTTCACGGCTTTCTTG      | GTCGTATCCAGTGCAGGGTCCGAGGTATTCGCACTGGATACGAC GCAGTT |
| <i>Tp</i> -miRNA159  | CGCGTTTGGATTGAAGGGAG    | GTCGTATCCAGTGCAGGGTCCGAGGTATTCGCACTGGATACGAC AAAGAG |
| PC-5p-84014          | CGGTTCCCTCCGGCAC        | GTCGTATCCAGTGCAGGGTCCGAGGTATTCGCACTGGATACGAC GGTGAA |
| PC-3p-212-24745      | CGCGTTTTCGGGTGATTTG     | GTCGTATCCAGTGCAGGGTCCGAGGTATTCGCACTGGATACGAC CCACCT |
| <i>Tp</i> -GA20ox    | ACTCCTGGGAAATGACGAGG    | AAGGAGAACGGTGAGGGATG                                |
| <i>Tp</i> -NAC       | CTTGATGCGGGAATTCAGTT    | ATTGGCTTTGTATGCGGTTC                                |
| <i>Tp</i> -CYP707A1  | AGCTAGCGTTCTCACCTGGA    | TCCACATCTTGCACTGCTTC                                |
| <i>Tp</i> -DELLA     | CGAGTCCAGCAGCTAATGTG    | GCTTCAAGAATGGCTCCGTT                                |
| <i>Tp</i> -PYL       | GGGTGGGTCTGTGTGTTCGA    | CCCTCTCAGTAATCGCCGCA                                |
| <i>Tp</i> -ARF       | TCGTGTGATCAATGTCCAGC    | GAACGAGTGAACATGTGGCC                                |

**Table S2.** cDNA synthesis.

| Component                                                 | Dosage   |
|-----------------------------------------------------------|----------|
| 4×gDNA wiper Mix                                          | 4 µL     |
| Templet RNA                                               | 1.2 µL   |
| Rnase free ddH <sub>2</sub> O                             | To 16 µL |
| First PCR: 42 °C 2 min                                    |          |
| Last step reaction liquid 16 µL + 5×Hicript qRT super Mix | 4 µL     |
| Second PCR: 50 °C 15 min                                  |          |
| 85 °C 5 sec                                               |          |

**Table S3.** Reaction system and procedure of qRT-PCR.

|                     |                            |             |               |
|---------------------|----------------------------|-------------|---------------|
| PCR reaction system |                            |             |               |
|                     | Reagent                    | Volume      | Concentration |
|                     | MonAmp™ SYBRGreen qPCR Mix | 10          | 1×            |
|                     | Forward primer             | 1           | 0.2 μM        |
|                     | Reverse primer             | 1           | 0.2 μM        |
|                     | Template DNA               | 1           | 200 ng/ 20 μL |
|                     | ddH <sub>2</sub> O         | 7           |               |
| PCR procedure       |                            |             |               |
|                     | Step                       | Temperature | Time          |
|                     | Predegeneration            | 95          | 30 sec        |
|                     | Denaturation               | 95          | 5 sec         |
|                     | Annealing and extension    | 55-68       | 30 sec        |
|                     |                            |             | 40 cycle      |
